# Supplementary material for: Synthesis, structural characterization and magnetic behaviour of a family of [CoIII2LnIII2] butterfly compounds
Source: Royal Society of Chemistry journal article supplement (doi:10.1039/c6dt04713k), 2017-01-01
Supplement: c6dt04713k1.pdf [file c6dt04713k1.pdf]

# Electronic Supplementary Information

## Synthesis, structural characterization and magnetic behaviour of a butterfly $[\text{Co}_2^{\text{III}}\text{Ln}_2^{\text{III}}]$ compounds family

**Alejandro V. Funes<sup>[a]</sup>, Luca Carrella<sup>[b]</sup>, Yvonne Rechkemmer<sup>[c]</sup>, Joris van Slageren<sup>[c]</sup>,  
Eva Rentschler<sup>[b]</sup> and Pablo Alborés<sup>[a]\*</sup>**

[a] Departamento de Química Inorgánica, Analítica y Química Física/ INQUIMAE  
(CONICET), Facultad de Ciencias Exactas y Naturales Universidad de Buenos Aires,  
Pabellón 2, Ciudad Universitaria, C1428EHA Buenos Aires, Argentina

Fax: +5411 / 4576-3341

E-mail: albores@qi.fcen.uba.ar

[b] Institut für Anorganische Chemie und Analytische Chemie, Johannes Gutenberg -  
Universität Mainz, Duesbergweg 10-14 D-55128, Mainz, Germany.

[c] Institut für Physikalische Chemie, Universität Stuttgart, Pfaffenwaldring 55, D-70569,  
Stuttgart, Germany.

**Table ESI1.** Main bond angles ( $^{\circ}$ ) and distances ( $\text{\AA}$ ) of **1-5**.

|               | <b>1</b>  | <b>2</b>  | <b>3</b>  | <b>4</b>   | <b>5</b>   |
|---------------|-----------|-----------|-----------|------------|------------|
| Ln1-O12       | 2.379(3)  | 2.360(3)  | 2.362(3)  | 2.339(2)   | 2.334(2)   |
| Ln1-O13       | 2.403(3)  | 2.455(5)  | 2.376(4)  | 2.436(3)   | 2.338(4)   |
| Ln1-O14       | 2.269(3)  | 2.253(3)  | 2.245(4)  | 2.226(2)   | 2.211(3)   |
| Ln1-O15       | 2.451(2)  | 2.446(4)  | 2.442(4)  | 2.420(3)   | 2.407(3)   |
| Ln1-O15_a     | 2.457(2)  | 2.454(3)  | 2.443(3)  | 2.434(2)   | 2.419(2)   |
| Ln1-O21       | 2.359(3)  | 2.372(3)  | 2.336(3)  | 2.327(2)   | 2.313(3)   |
| Ln1-O23       | 2.460(3)  | 2.389(4)  | 2.451(5)  | 2.361(3)   | 2.418(3)   |
| Ln1-O24       | 2.273(2)  | 2.261(4)  | 2.239(3)  | 2.231(3)   | 2.206(2)   |
| Co2-N14       | 1.991(4)  | 1.990(4)  | 1.984(5)  | 1.984(4)   | 1.985(3)   |
| Co2-O11       | 1.913(2)  | 1.907(3)  | 1.917(3)  | 1.912(2)   | 1.911(2)   |
| Co2-O14       | 1.882(2)  | 1.892(4)  | 1.884(3)  | 1.890(2)   | 1.877(2)   |
| Co2-O15       | 1.936(2)  | 1.935(4)  | 1.932(4)  | 1.931(3)   | 1.931(2)   |
| Co2-O22       | 1.909(2)  | 1.914(3)  | 1.915(3)  | 1.912(2)   | 1.905(3)   |
| Co2-O24       | 1.885(2)  | 1.881(3)  | 1.893(4)  | 1.882(2)   | 1.889(2)   |
| Ln1-Ln1_b     | 8.298(1)  | 8.3012(4) | 8.3179(5) | 8.290(3)   | 8.360(3)   |
| Ln1-O15-Ln1_a | 113.58(9) | 113.5(1)  | 113.4(1)  | 113.90(9)  | 113.70(9)  |
| Ln1_a-O14-Co2 | 105.0(1)  | 104.4(2)  | 105.0(2)  | 103.8(1)   | 104.9(1)   |
| Ln1-O15-Co2   | 96.96(9)  | 96.6(1)   | 96.0(1)   | 96.43(9)   | 95.82(9)   |
| Ln1_a-O15-Co2 | 96.76(9)  | 96.4(1)   | 96.6(1)   | 95.89(9)   | 95.87(9)   |
| Ln1-O24-Co2   | 104.8(1)  | 105.0(2)  | 104.2(2)  | 105.1(1)   | 104.1(1)   |
| Ln1-Co2-Ln1_a | 76.88(1)  | 77.05(2)  | 77.11(2)  | 77.24(1)   | 77.14(1)   |
| Co2-Ln1-Co2_a | 103.12(1) | 102.95(2) | 102.89(2) | 102.76 (1) | 102.86 (1) |

Symmetry code: (a) 1-x, -y, 2-z ; (b) -x, -y, 2-z

**Table ESI2.** Main bond angles (°) and distances (Å) of **6**.

| Distances (Å) |           | Angles (°)     |           |
|---------------|-----------|----------------|-----------|
| <b>6</b>      |           | <b>6</b>       |           |
| Gd1-O1        | 2.385(3)  | Gd1-O7-Gd1_a   | 114.7(1)  |
| Gd1-O3        | 2.284(3)  | Gd1-O3-Co4     | 106.1(1)  |
| Gd1-O7        | 2.515(3)  | Gd1-O4_a-Co4_a | 104.5(1)  |
| Gd1-O9        | 2.381(5)  | Gd1-O7-Co4     | 96.3(1)   |
| Gd1-O11       | 2.477(3)  | Gd1_a-O7-Co4   | 97.7(1)   |
| Gd2-O12       | 2.305(3)  | Gd2-O16-Gd2_b  | 114.5(1)  |
| Gd2-O16       | 2.530(3)  | Gd2-O12-Co3    | 106.2(1)  |
| Gd2-O17       | 2.474(5)  | Gd2_b-O13-Co3  | 104.7(1)  |
| Gd2-O18       | 2.365(3)  | Gd2-O16-Co3    | 96.4(1)   |
| Gd2-O21       | 2.374(4)  | Gd2_b-O16-Co3  | 97.5(1)   |
| Co3-N2        | 2.002(4)  | Gd1-Co4-Gd1-a  | 78.05(2)  |
| Co3-O12       | 1.875(3)  | Co4-Gd1-Co4_a  | 101.95(2) |
| Co3-O13       | 1.884(4)  | Gd2-Co3-Gd2_b  | 77.94(2)  |
| Co3-O14       | 1.912(3)  | Co3-Gd2-Co3_b  | 102.06(2) |
| Co3-O16       | 1.935(3)  |                |           |
| Co3-O20       | 1.922(4)  |                |           |
| Co4-N1        | 1.988(5)  |                |           |
| Co4-O2        | 1.927(3)  |                |           |
| Co4-O3        | 1.877(3)  |                |           |
| Co4-O4        | 1.884(3)  |                |           |
| Co4-O6        | 1.908(3)  |                |           |
| Co4-O7        | 1.934(3)  |                |           |
| Gd1-Gd1_a     | 4.200(6)  |                |           |
| Gd2-Gd2_b     | 4.2017(6) |                |           |

Symmetry code: (a) 1-x, -y, -z ; (b) 1-x, 1-y, -1-z ; (c) 2-x, -y, -z

**Table ESI3.** Intra-molecular and closest Ln ⋯ Ln inter-molecular distances (Å) of **1-6**.

|               | <b>1</b>  | <b>2</b>  | <b>3</b>  | <b>4</b> | <b>5</b> | <b>6</b>           |
|---------------|-----------|-----------|-----------|----------|----------|--------------------|
| Ln-Ln (intra) | 4.1061(6) | 4.0970(4) | 4.0840(4) | 4.069(1) | 4.041(1) | 4.200(6)/4.2017(6) |

Ln-Ln (inter) 8.298(1) 8.3012(4) 8.3179(5) 8.290(3) 8.360(3) 9.387(1)/9.698(1)

**Figure ESI1.** Molecule representation of complex 5. H atoms omitted for sake of clarity.

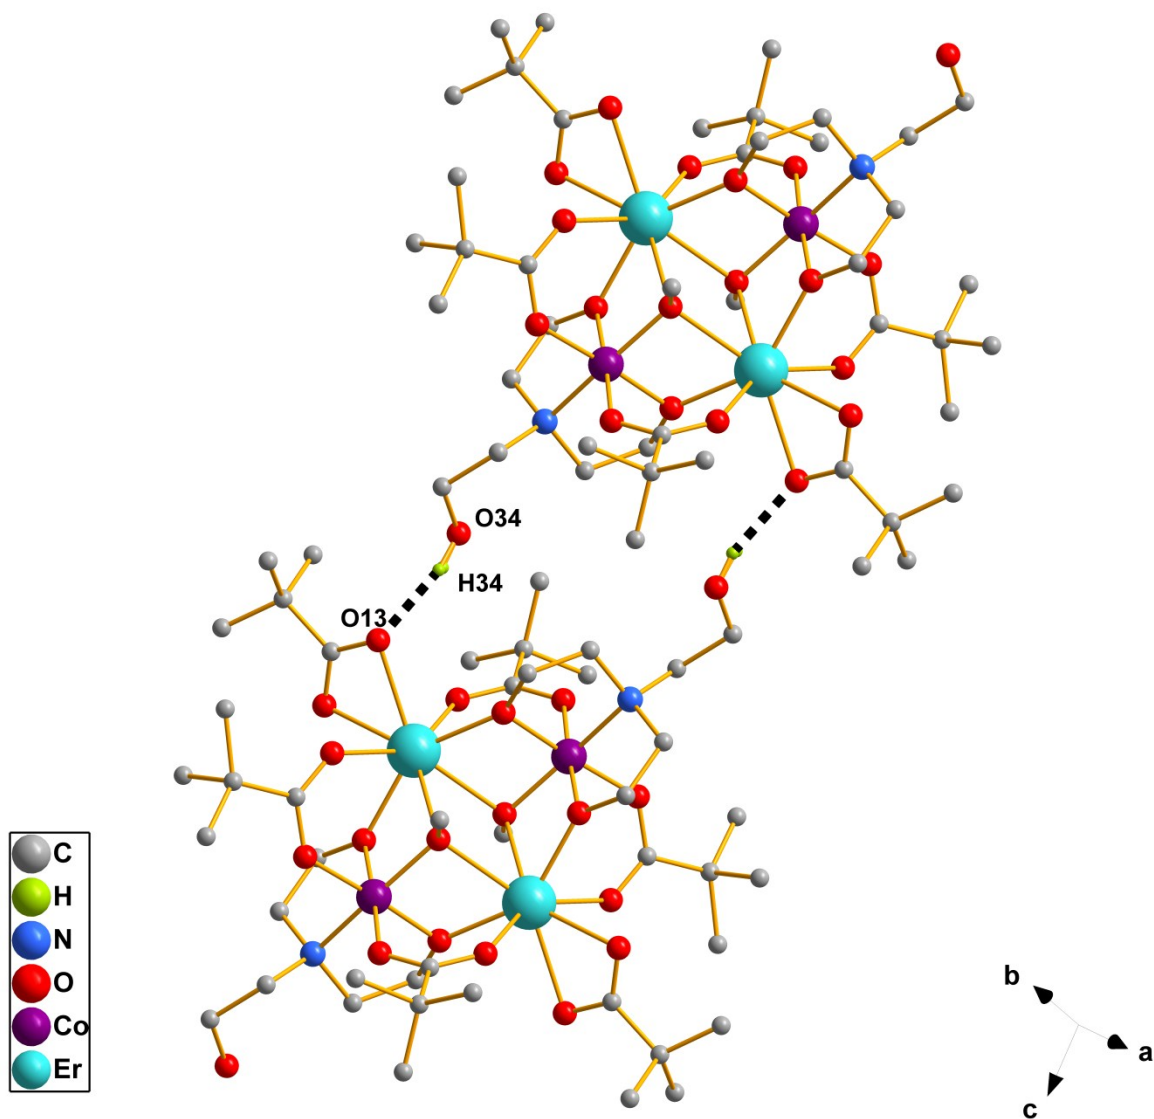

**Figure ESI2.** Ball and stick molecular representation of complex 5 structure highlighting the inter-molecular H-bond interactions. H atoms omitted for sake of clarity

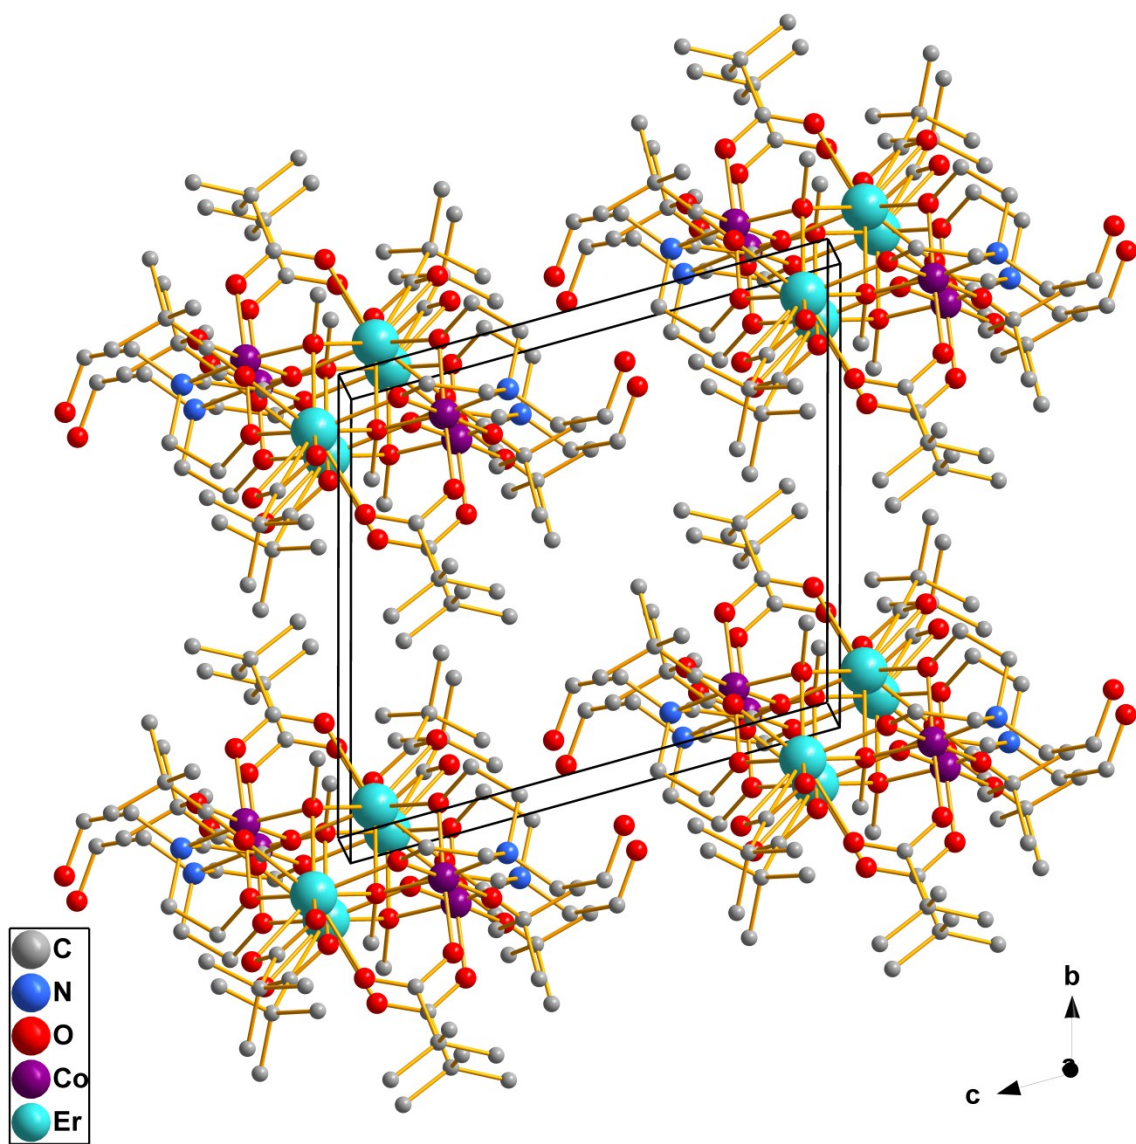

**Figure ESI3.** Ball and stick molecular representation of complex **5** crystal packing. View along  $a$ - axis.

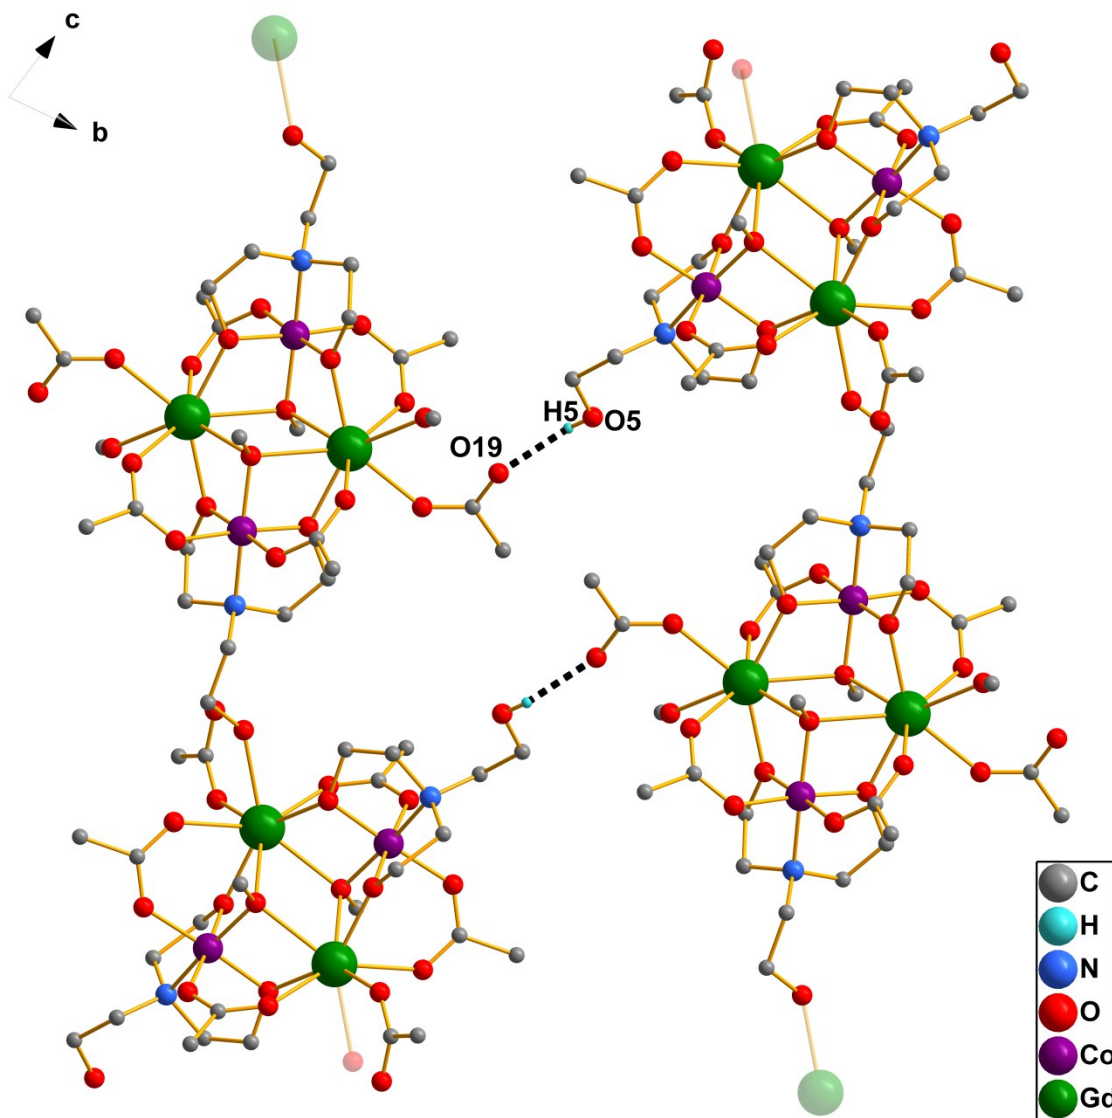

**Figure ESI4.** Ball and stick molecular representation of complex **6** structure highlighting the inter-molecular H-bond interactions between chains. H atoms omitted for sake of clarity.

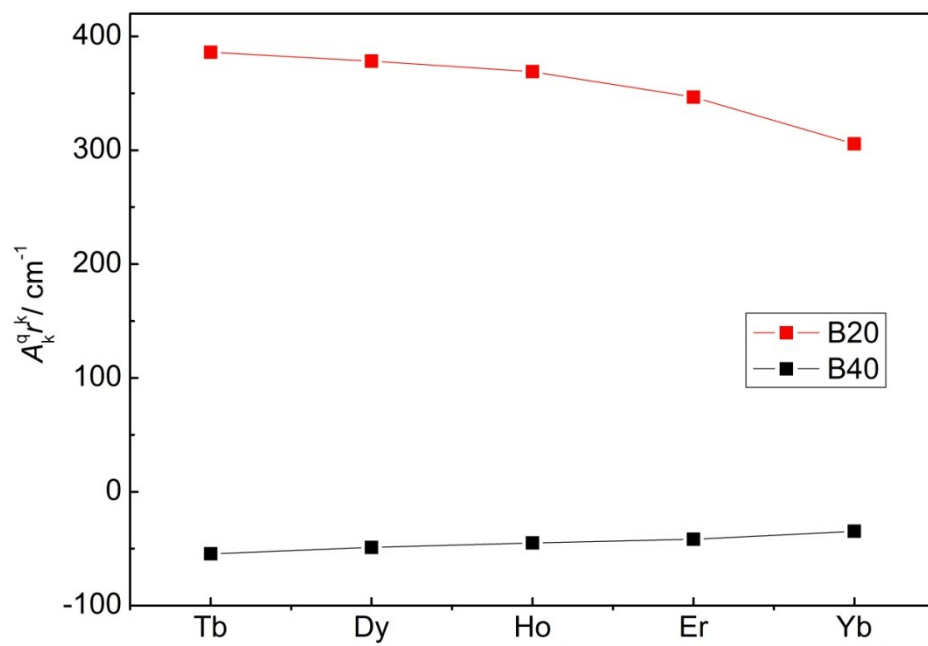

**Figure ES15.** Correlation of best fitting crystal field parameters,  $A_2^0 \langle r^2 \rangle$  and  $A_4^0 \langle r^4 \rangle$  with increasing Ln(III) Z number.

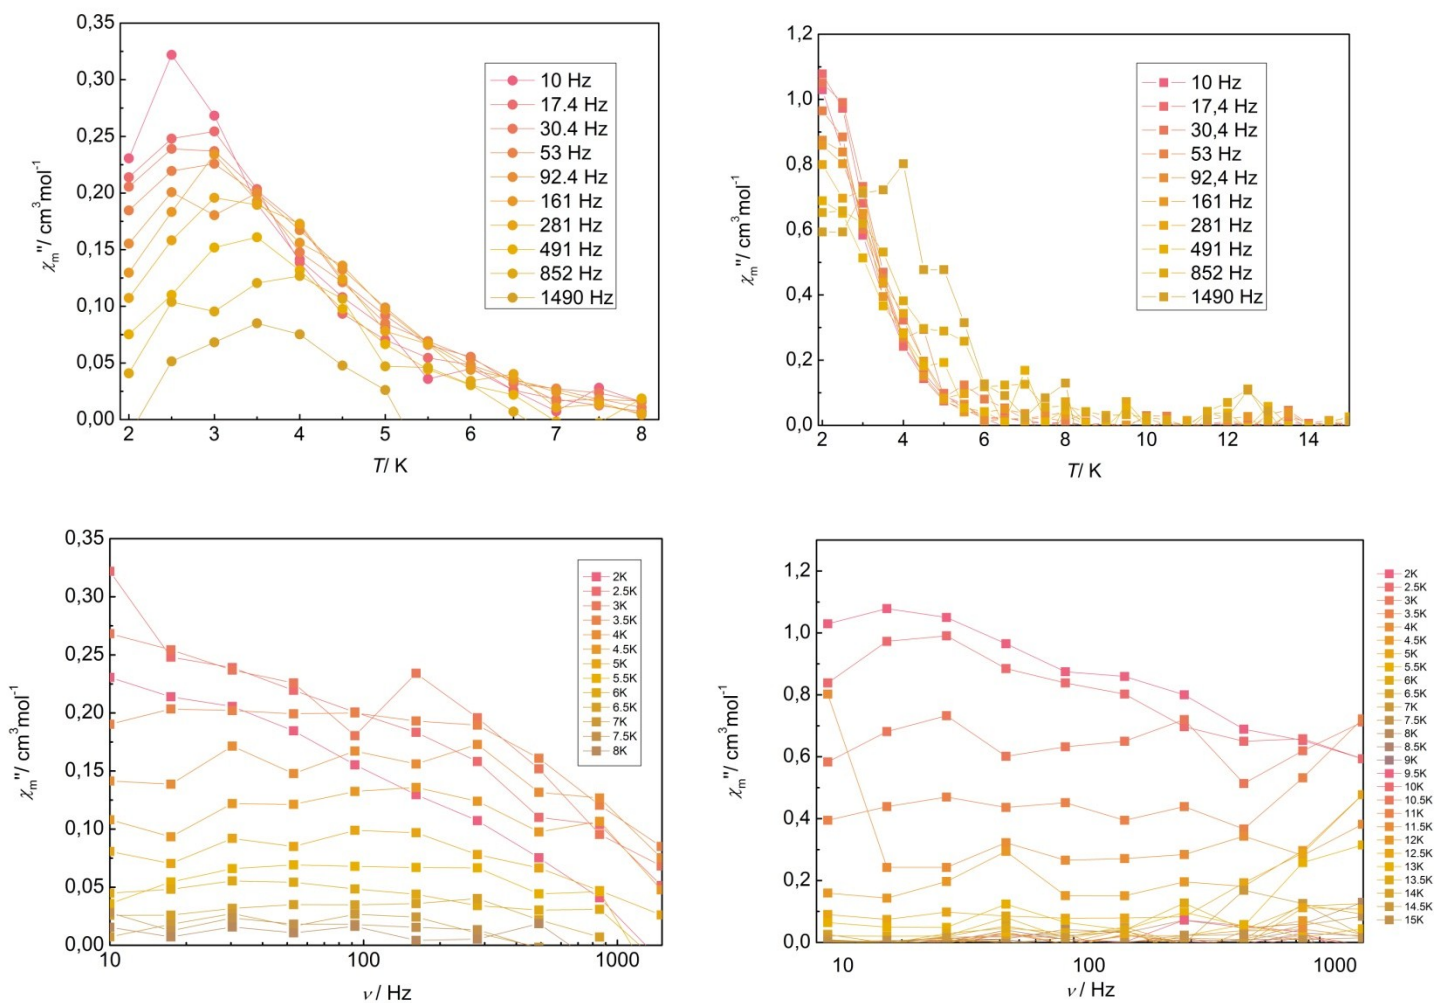

**Figure ESI6.** Temperature (top) and frequency (bottom) AC out of phase susceptibility data dependence of complexes **1**, Tb (right) and **3**, Ho (left) under 1 and 3 kOe DC applied field respectively. Full lines are just for eyes guiding. Frequency dependence plot is shown in logarithmic scale.



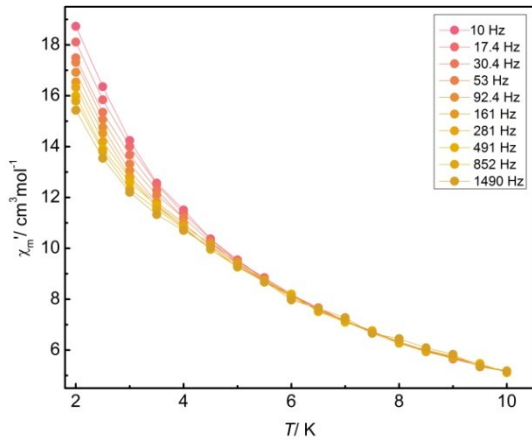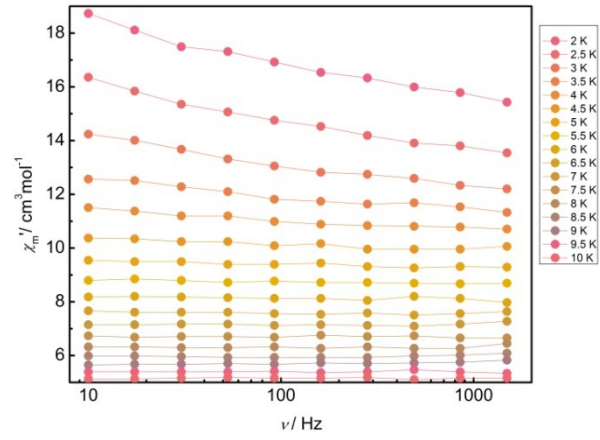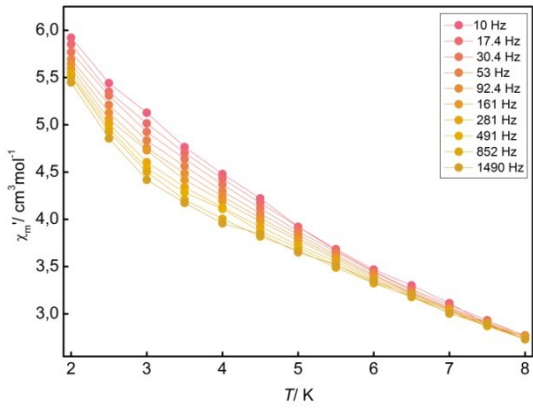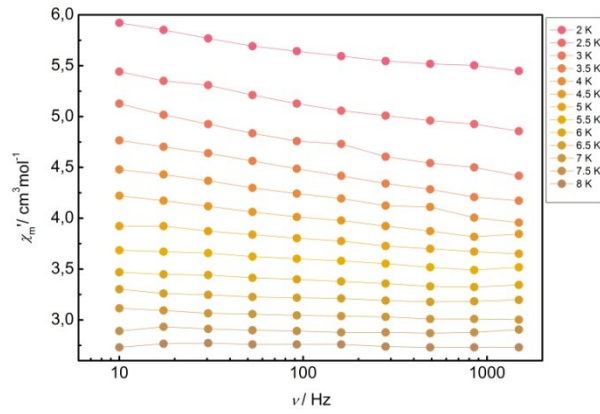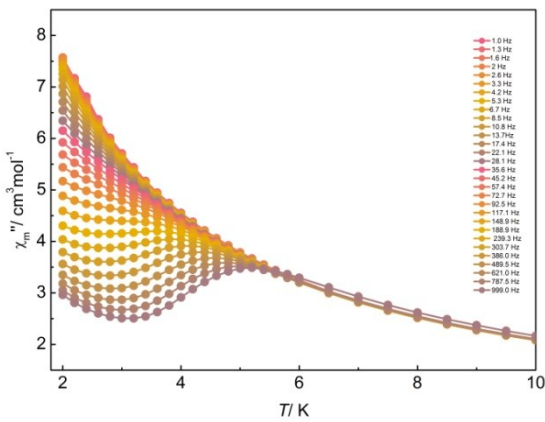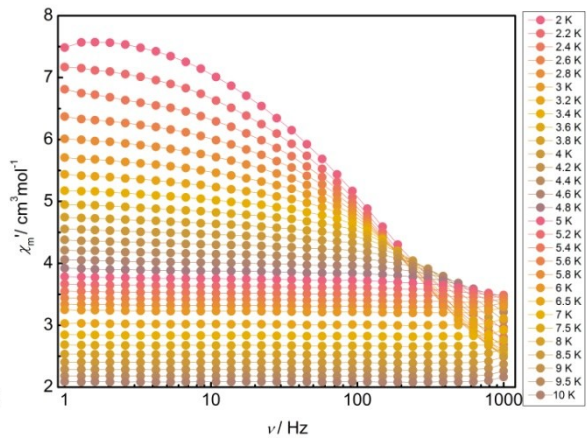

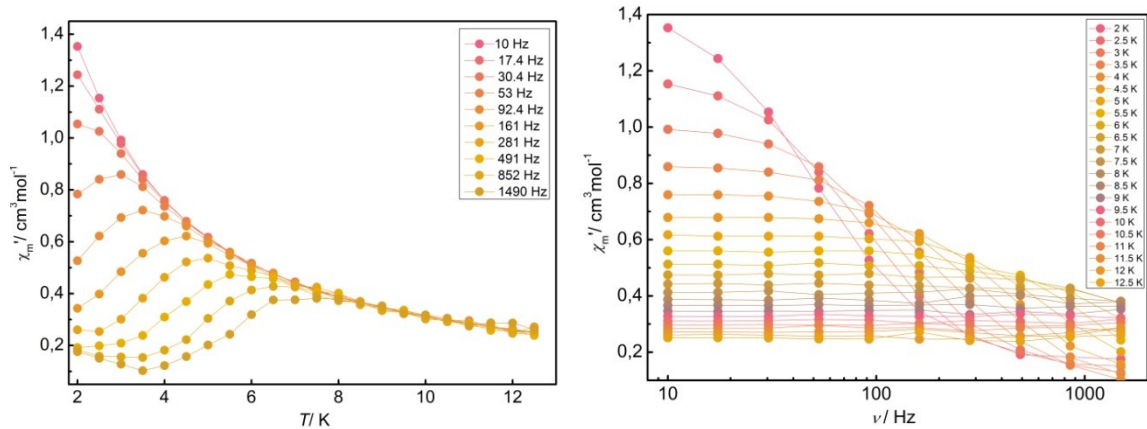

**Figure ESI7.** Temperature (left) and frequency (right) AC in phase susceptibility data dependence of complexes **1** (Tb), **3**, (Ho), **4**(Er) and **5** (Yb) (top to bottom) under DC applied field. Full lines are just for eyes guiding. Frequency dependence plot is shown in logarithmic scale.

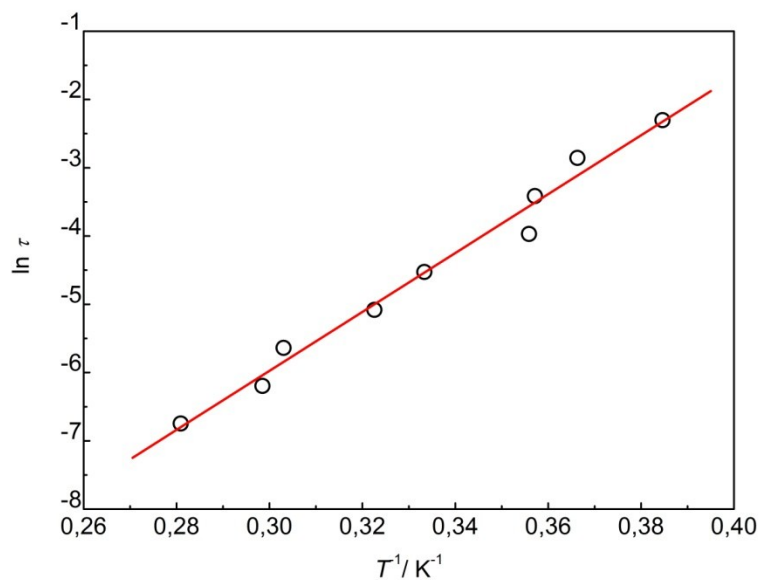

**Figure ESI8.** Temperature dependence of characteristic magnetization relaxation times as  $\ln \tau$  vs.  $T^{-1}$  plots of complex **3**, Ho. Full line: best fitting plot, see text.

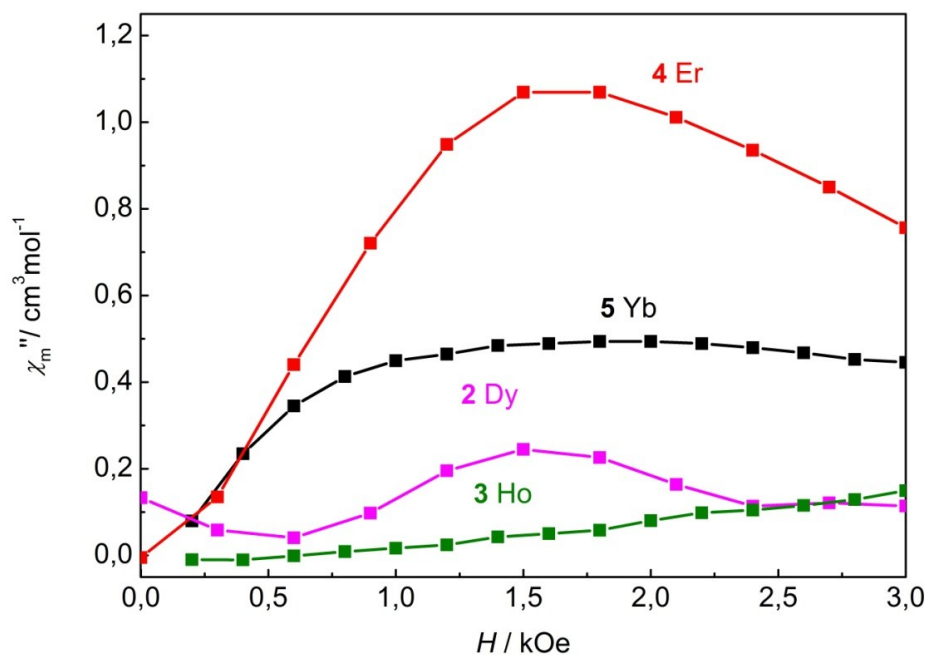

**Figure ESI9.** Out of phase susceptibility response at 2K with 100 Hz AC frequency under DC applied fields in the range 0-3 kOe for complexes **1-5**. Lines are just as eyes-guideline.

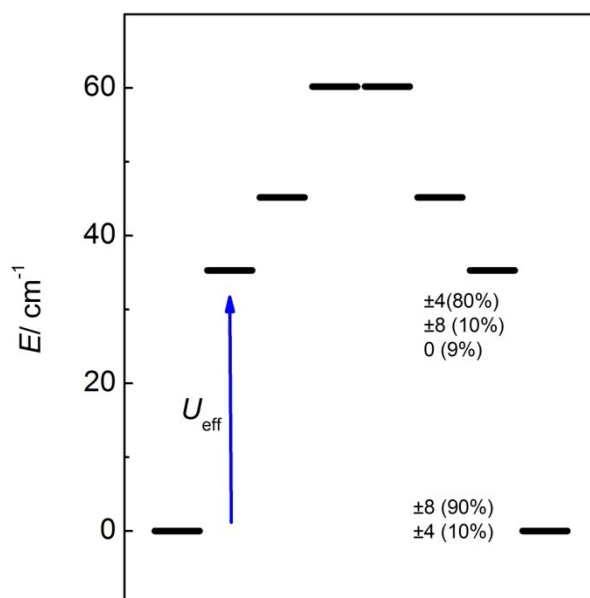

**Figure**

**ESI10.** Crystal

field low lying energy level splitting of  $J=8$  manifold as arising from DC data fitting of Ho complex **3**.

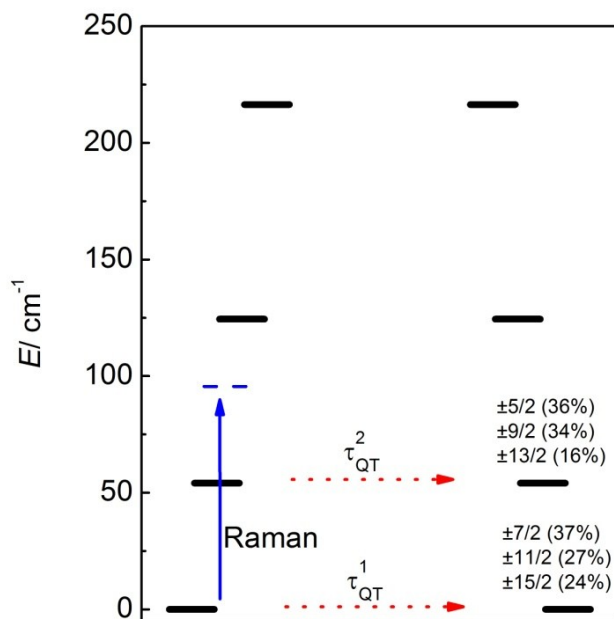

**Figure ESI11.** Crystal field low lying energy level splitting of  $J=15/2$  manifold as arising from DC data fitting of Er complex **4**.

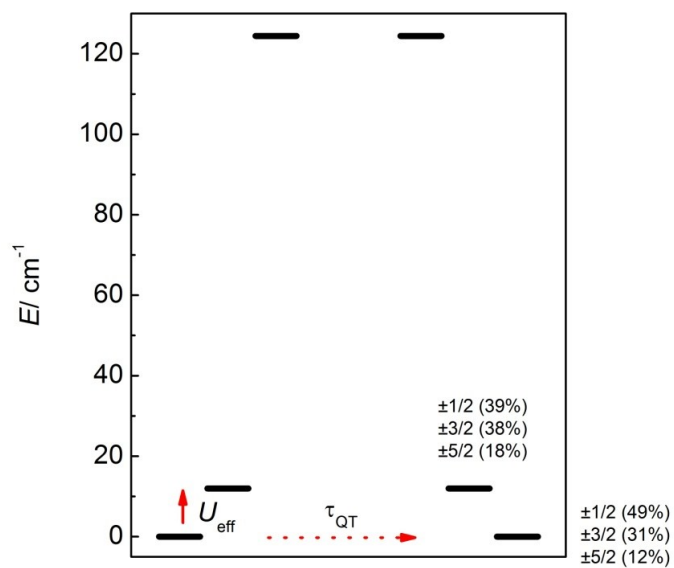

**Figure ESI12.** Crystal field low lying energy level splitting of  $J=7/2$  manifold as arising from DC data fitting of Yb complex **5**.
